# Supplementary material for: Fe3GaTe2/MoSe2 ferromagnet/semiconductor 2D van der Waals heterojunction for room-temperature spin-valve devices
Source: Royal Society of Chemistry journal article supplement (doi:10.1039/d2ce01695h), 2023-01-01
Supplement: d2ce01695h1.pdf [file d2ce01695h1.pdf]

## Supporting Information

### **Fe<sub>3</sub>GaTe<sub>2</sub>/MoSe<sub>2</sub> Ferromagnet/Semiconductor 2D van der Waals Heterojunction for Room-Temperature Spin-Valve Devices**

Hongfei Yin,<sup>1,2,†</sup> Pengzhen Zhang,<sup>1,2,†</sup> Wen Jin,<sup>1,2</sup> Boyuan Di,<sup>1,2</sup> Hao Wu,<sup>1,2,3</sup> Gaojie Zhang,<sup>1,2</sup>

Wenfeng Zhang,<sup>1,2</sup> Haixin Chang<sup>1,2,3\*</sup>

<sup>1</sup>Center for Joining and Electronic Packaging, State Key Laboratory of Material Processing and Die & Mold Technology, School of Materials Science and Engineering, Huazhong University of Science and Technology, Wuhan 430074, China.

<sup>2</sup>Shenzhen R&D Center of Huazhong University of Science and Technology, Shenzhen 518000, China.

<sup>3</sup> Wuhan National High Magnetic Field Center and Institute for Quantum Science and Engineering, Huazhong University of Science and Technology, Wuhan 430074, China.

†These authors contributed equally.

\*Corresponding author. E-mail: hxchang@hust.edu.cn

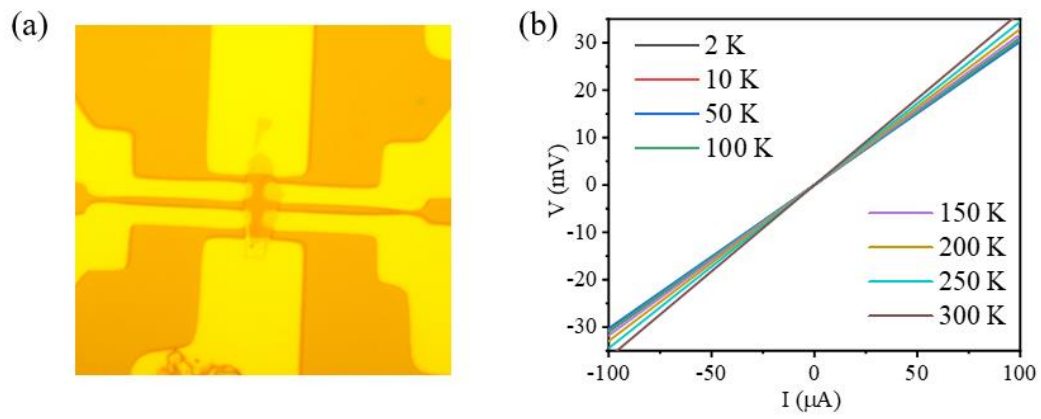

**Figure S1.** Optical image and Electrical properties of the  $\text{Fe}_3\text{GaTe}_2$  Hall bar device. (a) Optical image of the Hall bar device. (b) I-V curves of the  $\text{Fe}_3\text{GaTe}_2$  the Hall bar device at different temperatures.

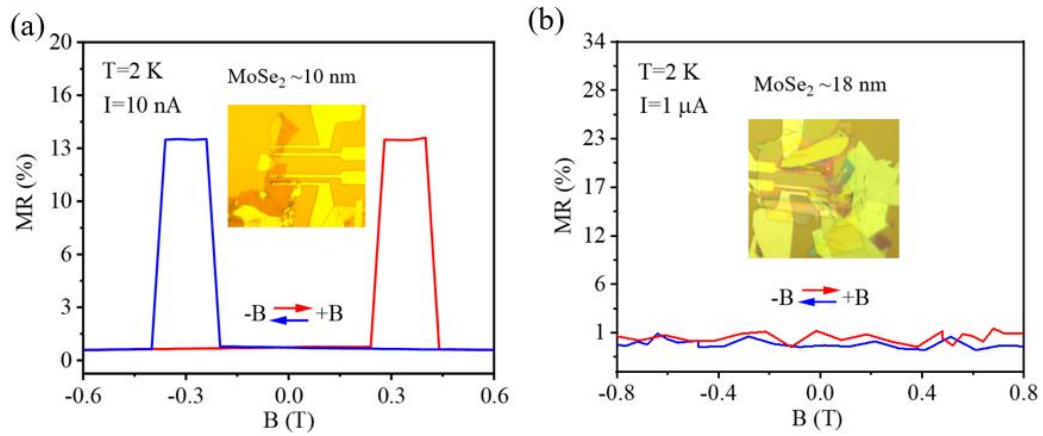

**Figure S2.** The representative MR signals of spin valves with different MoSe<sub>2</sub> thicknesses. The thicknesses of MoSe<sub>2</sub> spacer layer are about (a) 10 nm, (b) 18 nm, respectively. The insets in (a) and (b) are optical images of the corresponding devices.
